# Supplementary material for: Role of alkali charge compensation in the luminescence of CaWO4:Nd3+ and SrWO4:Nd3+ Scheelites
Source: Royal Society of Chemistry journal article supplement (doi:10.1039/d0nj00651c), 2020-01-01
Supplement: d0nj00651c1.pdf [file d0nj00651c1.pdf]

## Role of alkali charge compensator in the luminescence: A case study with $\text{CaWO}_4:\text{Nd}^{3+}$ and $\text{SrWO}_4:\text{Nd}^{3+}$ scheelite

Debarati Das<sup>1</sup>, Santosh .K. Gupta<sup>1\*</sup>, C.S. Datrik<sup>2</sup>, P. Nandi<sup>3</sup>, K. Sudarshan<sup>1,4\*</sup>

<sup>1</sup>Radiochemistry Division, Bhabha Atomic Research Centre, Mumbai-400085, India

<sup>2</sup>Product Development Section, Bhabha Atomic Research Centre, Mumbai-400085, India

<sup>3</sup>Glass and Advanced Ceramics Division, Bhabha Atomic Research Centre, Mumbai-400085, India

<sup>4</sup>Homi Bhabha National Institute, Anushaktinagar, Mumbai – 400094, India

\*To whom correspondence should be addressed. santoshg@barc.gov.in Tel.: +91-22-25590636 (SKG) and kathis@barc.gov.in Tel.: +91-22-25590737 (KS)

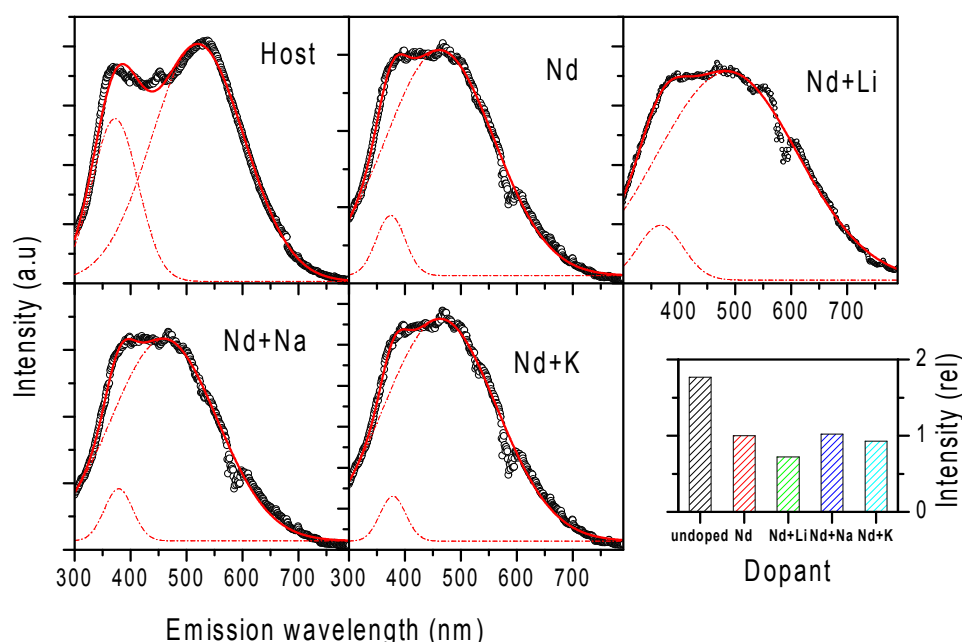

Figure S1. Deconvoluted emission spectra ( $\lambda_{\text{ex}}=250$  nm) of undoped and doped  $\text{CaWO}_4$  along with histogram showing variation in relative emission intensity.

Table S1. Summary of the visible emission data fitted to two peaks in undoped and doped  $\text{CaWO}_4$  samples with  $\lambda_{\text{ex}} = 250\text{nm}$

| Dopant in $\text{CaWO}_4$      | Peak 1        |            |                | Peak 2        |             |                |
|--------------------------------|---------------|------------|----------------|---------------|-------------|----------------|
|                                | Centroid (nm) | FWHM(nm)   | Intensity (%)  | Centroid (nm) | FWHM(nm)    | Intensity (%)  |
| Undoped                        | $372 \pm 0.4$ | $96 \pm 1$ | $25.4 \pm 0.5$ | $520 \pm 0.6$ | $193 \pm 2$ | $74.6 \pm 0.7$ |
| $\text{Nd}^{3+}$               | $374 \pm 0.5$ | $60 \pm 2$ | $6.6 \pm 0.3$  | $462 \pm 0.7$ | $227 \pm 2$ | $93.4 \pm 0.8$ |
| $\text{Nd}^{3+} + \text{Li}^+$ | $367 \pm 1$   | $93 \pm 6$ | $8 \pm 1$      | $486 \pm 3$   | $293 \pm 6$ | $92 \pm 3$     |
| $\text{Nd}^{3+} + \text{Na}^+$ | $379 \pm 1$   | $60 \pm 2$ | $6.5 \pm 0.4$  | $460 \pm 1$   | $220 \pm 2$ | $93.4 \pm 0.9$ |
| $\text{Nd}^{3+} + \text{K}^+$  | $379 \pm 1$   | $54 \pm 3$ | $4.4 \pm 0.3$  | $463 \pm 1$   | $235 \pm 2$ | $95.5 \pm 0.8$ |

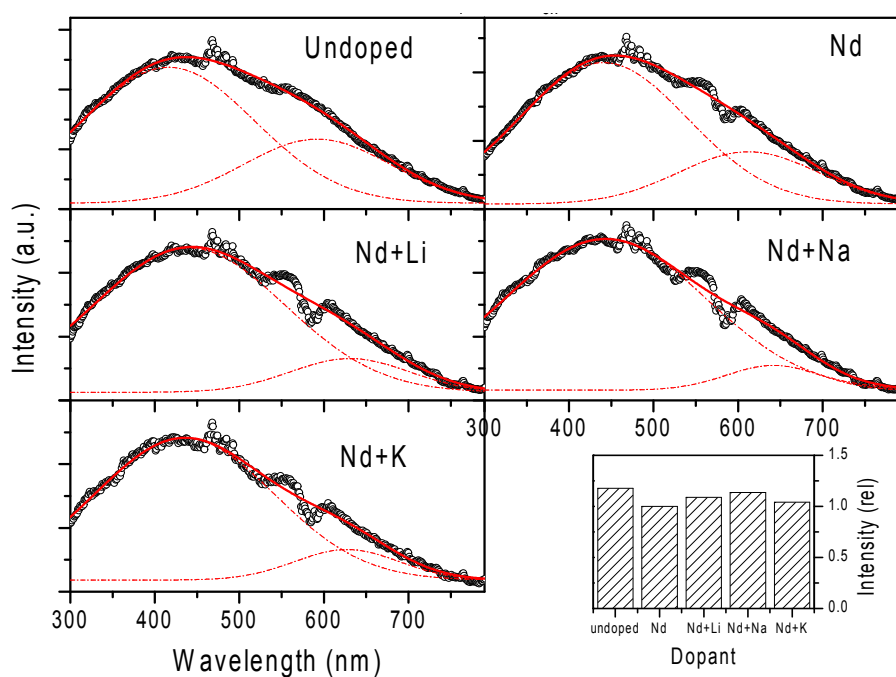

Figure S2. Deconvoluted emission spectra ( $\lambda_{\text{ex}}=250$  nm) of undoped and doped  $\text{SrWO}_4$  along with histogram showing variation in relative emission intensity.

Table S2. Summary of the visible emission data fitted to two peaks in undoped and doped  $\text{SrWO}_4$  samples with  $\lambda_{\text{ex}} = 250$  nm

| Dopant in $\text{SrWO}_4$     | Peak 1        |             |               | Peak 2        |              |               |
|-------------------------------|---------------|-------------|---------------|---------------|--------------|---------------|
|                               | Centroid (nm) | FWHM(nm)    | Intensity (%) | Centroid (nm) | FWHM(nm)     | Intensity (%) |
| Undoped                       | 416 $\pm$ 6   | 237 $\pm$ 7 | 71 $\pm$ 4    | 592 $\pm$ 8   | 203 $\pm$ 9  | 29 $\pm$ 5    |
| $\text{Nd}^{3+}$              | 440 $\pm$ 5   | 233 $\pm$ 5 | 77 $\pm$ 3    | 612 $\pm$ 8   | 193 $\pm$ 2  | 23 $\pm$ 4    |
| $\text{Nd}^{3++} \text{Li}^+$ | 441 $\pm$ 3   | 264 $\pm$ 6 | 87 $\pm$ 2    | 631 $\pm$ 5   | 165 $\pm$ 12 | 13 $\pm$ 2    |
| $\text{Nd}^{3++} \text{Na}^+$ | 443 $\pm$ 1   | 278 $\pm$ 5 | 93 $\pm$ 2    | 642 $\pm$ 3   | 130 $\pm$ 10 | 7 $\pm$ 1     |
| $\text{Nd}^{3++} \text{K}^+$  | 435 $\pm$ 2   | 248 $\pm$ 4 | 89 $\pm$ 2    | 627 $\pm$ 4   | 145 $\pm$ 9  | 11 $\pm$ 1    |

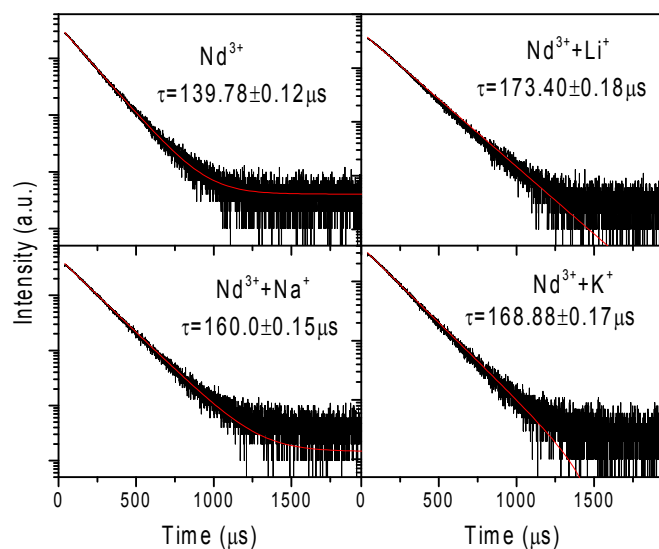

Figure S3. PL lifetime spectra in alkali doped  $\text{CaWO}_4:\text{Nd}^{3+}$  for emission of 1056nm with excitation at 583 nm.

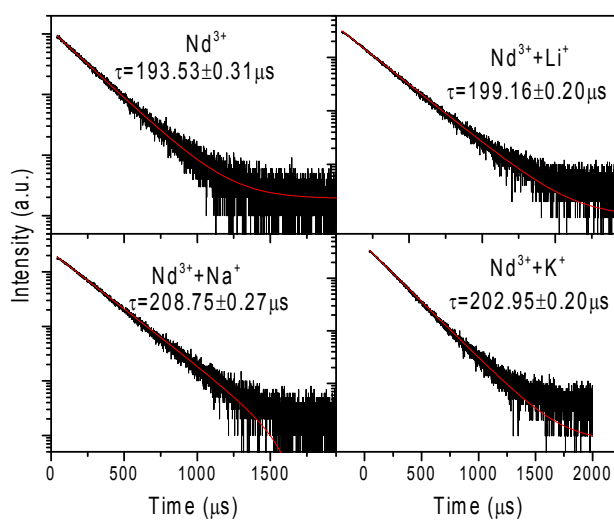

Figure S4. PL lifetime spectra in alkali doped  $\text{SrWO}_4:\text{Nd}^{3+}$  for emission of 1056 nm with excitation at 583 nm.
